# Supplementary material
Source: PubMed Central journal article supplement (PMC8005755)
Supplement: mmc2.pdf [file mmc2.pdf]

## **ONLINE SUPPLEMENTARY MATERIAL**

### **COPD and the Risk of Poor Outcomes in COVID-19: a Systematic Review and Meta-analysis**

Firoozeh V. Gerayeli, BA<sup>1</sup>, Stephen Milne, PhD<sup>1,2,3</sup>, Chung Cheung, PhD<sup>1</sup>, Xuan Li, MSc<sup>1</sup>, Cheng Wei Tony Yang, PhD<sup>1</sup>, Anthony Tam, PhD<sup>1</sup>, Lauren H. Choi<sup>1</sup>, Annie Bae<sup>1</sup>, Don D. Sin, MD<sup>1,2</sup>

Author affiliations:

1. Centre for Heart Lung Innovation, St. Paul's Hospital, University of British Columbia, Vancouver, BC
2. Division of Respiratory Medicine, University of British Columbia, Vancouver, BC.
3. Faculty of Medicine and Health, University of Sydney, Sydney, NSW, Australia

**Corresponding author:**

Don D. Sin

Centre for Heart Lung Innovation, St. Paul's Hospital, University of British Columbia  
1081 Burrard Street, Vancouver, BC, V6Z 1Y6 Canada.

Tel +1 604 806 8818

Fax +1 604 806 9274

Email: don.sin@hli.ubc.ca

## Diverse Health Outcomes & Severity Reported

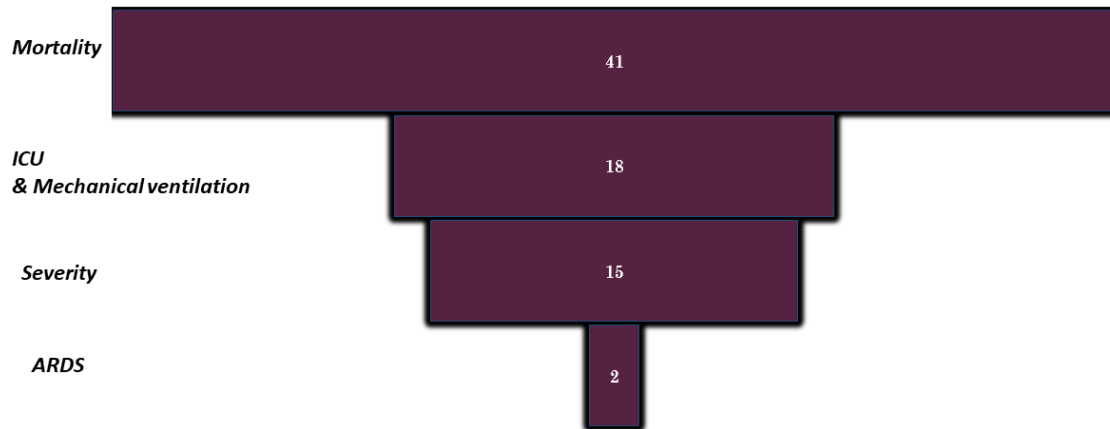

**Figure S1: Diverse Health Outcomes & Severity Reported**

Presence of significant heterogeneity in the reported outcome by selected studies for the meta-analysis

**Table S1: Examination for potentially overlapping patient populations among the included studies**

| <b>Country: China</b> | <b>Hospitals</b>                                                                                                                                                                | <b>Authors</b>              | <b>Recruitment and Follow-up period</b>                            |
|-----------------------|---------------------------------------------------------------------------------------------------------------------------------------------------------------------------------|-----------------------------|--------------------------------------------------------------------|
|                       | Renmin hospital                                                                                                                                                                 | Wang L et.al <sup>1</sup>   | January 31 to February 5, 2020                                     |
|                       | Renmin hospital                                                                                                                                                                 | Jiang et.al <sup>2</sup>    | January 30 to March 8, 2020 (followed til April 10 2020)           |
|                       | Jinyin-tan Hospital                                                                                                                                                             | Huang C et.al <sup>3</sup>  | December 16, 2019, to January 2, 2020 (outcome reported by Jan 22) |
|                       | Jinyin-tan Hospital                                                                                                                                                             | Feng Y et.al <sup>4</sup>   | January 1, 2020, to February 15, 2020                              |
|                       | Jinyin-tan Hospital                                                                                                                                                             | Guan W.J et.al <sup>5</sup> | December 11th, 2019 to January 31, 2020                            |
|                       | Jinyin-tan hospital                                                                                                                                                             | Yang X et.al <sup>6</sup>   | Dec 24, 2019, to Jan 26, 2020 (last follow-up of Feb 9, 2020)      |
|                       | Jinyin-tan Hospital                                                                                                                                                             | Zhou F et.al <sup>7</sup>   | Dec 29, 2019 to Jan 31, 2020                                       |
|                       | No. 7 Hospital of Wuhan                                                                                                                                                         | Zhang J et.al <sup>8</sup>  | January 16 to February 3, 2020                                     |
|                       | Shanghai Public Health Clinical Center                                                                                                                                          | Feng Y. et.al <sup>4</sup>  | January 1, 2020, to February 15, 2020                              |
|                       | Shanghai Public Health Clinical Center                                                                                                                                          | Guan W.J et.al <sup>5</sup> | December 11th, 2019 to January 31, 2020                            |
|                       | The Wuhan Central Hospital                                                                                                                                                      | Guan W.J et.al <sup>5</sup> | December 11th, 2019 to January 31, 2020                            |
|                       | The Central Hospital of Wuhan                                                                                                                                                   | Wang Y et.al <sup>9</sup>   | January 1 to February 10, 2020                                     |
|                       | Third Xiangya Hospital                                                                                                                                                          | Guan W.J et.al <sup>5</sup> | December 11th, 2019 to January 31, 2020                            |
|                       | Tongling People's Hospital                                                                                                                                                      | Feng Y et.al <sup>4</sup>   | January 1, 2020, to February 15, 2020                              |
|                       | Tongling People's Hospital                                                                                                                                                      | Guan W.J et.al <sup>5</sup> | December 11th, 2019 to January 31, 2020                            |
|                       | Tongji Hospital                                                                                                                                                                 | Li K et.al <sup>10</sup>    | January 31 to March 5, 2020                                        |
|                       | Tongji Hospital                                                                                                                                                                 | Cui et.al <sup>11</sup>     | January 14 and March 9, 2020                                       |
|                       | Union Hospital Affiliated to Tongji Medical College of Huazhong University of science and technology                                                                            | Guan W.J et.al <sup>5</sup> | December 11th, 2019 to January 31, 2020                            |
|                       | Union Hospital Affiliated to Tongji Medical College of Huazhong University of Science and Technology & Shenzhen Union Hospital of Huazhong University of Science and Technology | Guan W.J et.al <sup>5</sup> | December 11th, 2019 to January 31, 2020                            |
|                       | Wuhan Pulmonary Hospital                                                                                                                                                        | Zhou F et.al <sup>7</sup>   | December 29, 2019 to January 31, 2020                              |

|                                     |                                                                          |                                      |                                                                             |
|-------------------------------------|--------------------------------------------------------------------------|--------------------------------------|-----------------------------------------------------------------------------|
|                                     | Wuhan Pulmonary Hospital                                                 | Guan W.J et.al <sup>5</sup>          | December 11, 2019 to January 31, 2020                                       |
|                                     |                                                                          |                                      |                                                                             |
|                                     | Zhongnan Hospital of Wuhan University                                    | Wang D et.al <sup>12</sup>           | January 1 to January 28, 2020; final date of follow-up was February 3, 2020 |
|                                     | Zhongnan Hospital of Wuhan University                                    | Zhang G et.al <sup>13</sup>          | January 2, 2020 to February 10, 2020                                        |
|                                     |                                                                          |                                      |                                                                             |
| <b>Country: USA (New York City)</b> | <b>Hospitals</b>                                                         | <b>Authors</b>                       | <b>Recruitment and Follow-up period</b>                                     |
|                                     | Mount Sinai                                                              | Mohamed et.al <sup>14</sup>          | March 28 to April 15, 2020                                                  |
|                                     | Mount Sinai                                                              | Van Gerwen et.al <sup>15</sup>       | March 1 to April 1, 2020                                                    |
|                                     | Mount Sinai                                                              | Gupta S et.al <sup>16</sup>          | March 4 to April 4, 2020                                                    |
|                                     |                                                                          |                                      |                                                                             |
|                                     | New York- Presbyterian Columbia university                               | Arganziano et.al <sup>17</sup>       | March 1 to April 5, 2020                                                    |
|                                     | ? New York- Presbyterian Queens university                               | Gupta S et.al <sup>16</sup>          | March 4 to April 4, 2020                                                    |
|                                     |                                                                          |                                      |                                                                             |
|                                     | Weill Cornell medicine                                                   | Goyal et.al <sup>18</sup>            | March 3 to March 27, 2020                                                   |
|                                     | Weill Cornell Medical Centre                                             | Gupta S. et.al <sup>16</sup>         | March 4 to April 4, 2020                                                    |
|                                     |                                                                          |                                      |                                                                             |
| <b>Country: Mexico</b>              | <b>Hospitals</b>                                                         | <b>Authors</b>                       | <b>Recruitment and Follow-up period</b>                                     |
|                                     | General directorate of epidemiology                                      | Bello-Chavolla et al <sup>19</sup>   | All positive PCR tests up to June 3, 2020                                   |
|                                     | General bureau of epidemiology                                           | Giannouchos T et al <sup>20</sup>    | All positive PCR tests up to May 2020                                       |
|                                     | General bureau of epidemiology                                           | Mancilla-Galindo et.al <sup>21</sup> | February 28 to May 30, 2020                                                 |
|                                     | Epidemiological source of respiratory diseases (475 monitoring units)    | Parra-Bracamonte et.al <sup>22</sup> | January 13 to July 17, 2020                                                 |
|                                     |                                                                          |                                      |                                                                             |
| <b>Country: Italy (Rome)</b>        | <b>Hospitals</b>                                                         | <b>Authors</b>                       | <b>Recruitment and Follow-up period</b>                                     |
|                                     | 5 COVID-19 designated treatment centres                                  | Violi et.al <sup>23</sup>            | March to April, 2020                                                        |
|                                     | Italian National Institute for Infectious Diseases (Lazzaro Spallanzani) | Lanini et.al <sup>24</sup>           | January 29 to March 28, 2020                                                |
|                                     |                                                                          |                                      |                                                                             |
| <b>Country: Italy (Milan)</b>       | <b>Hospitals</b>                                                         | <b>Authors</b>                       | <b>Recruitment and Follow-up period</b>                                     |
|                                     | the Network ICUs                                                         | Grasselli. et al <sup>25</sup>       | February 20 to April 22, 2020 (followed until May 30, 2020)                 |
|                                     | Policlinico di Monza hospital, (the Lombardy region)                     | Ciardullo et al <sup>26</sup>        | February 22 to May 15, 2020                                                 |

Subsequent comparison of the authors, site of the study and the date of recruitment and follow-up led to removal of ones that contained the fewer patients prior to the final analysis in order to avoid double counting of patients.

**Table S2: Risk of bias in the included studies**

| CLARITY<br>Risk of<br>Bias<br>assessment<br>questions | <p><i>Q1: Was the selection of exposed and non-exposed cohorts drawn from the same population?</i></p> <p><i>Q2: Can we be confident in the assessment of exposure?</i></p> <p><i>Q3: Can we be confident that the outcome of interest was not present at start of study?</i></p> <p><i>Q4: Did the study match exposed and unexposed for all variables that are associated with the outcome of interest or did the statistical analysis adjust for these prognostic variables?</i></p> <p><i>Q5: Can we be confident in the assessment of the presence or absence of prognostic factors?</i></p> <p><i>Q6: Can we be confident in the assessment of outcome?</i></p> <p><i>Q7: Was the follow up of cohorts adequate?</i></p> <p><i>Q8: Were co-interventions similar between groups?</i></p> |                                                                                                                                                                            |         |          |           |           |           |           |           |           |           |           |          |           |           |           |
|-------------------------------------------------------|------------------------------------------------------------------------------------------------------------------------------------------------------------------------------------------------------------------------------------------------------------------------------------------------------------------------------------------------------------------------------------------------------------------------------------------------------------------------------------------------------------------------------------------------------------------------------------------------------------------------------------------------------------------------------------------------------------------------------------------------------------------------------------------------|----------------------------------------------------------------------------------------------------------------------------------------------------------------------------|---------|----------|-----------|-----------|-----------|-----------|-----------|-----------|-----------|-----------|----------|-----------|-----------|-----------|
|                                                       | Responses                                                                                                                                                                                                                                                                                                                                                                                                                                                                                                                                                                                                                                                                                                                                                                                      | <p><b>“Definitely yes” (lower risk of bias) « “Probably yes” « “Probably no” « “Definitely no” (higher risk of bias) “N/A”: not applicable to the specific outcome</b></p> |         |          |           |           |           |           |           |           |           |           |          |           |           |           |
| First<br>Author                                       | Q1                                                                                                                                                                                                                                                                                                                                                                                                                                                                                                                                                                                                                                                                                                                                                                                             | Q2                                                                                                                                                                         | Q3      |          |           | Q4        |           |           | Q5        | Q6        |           |           | Q7       |           |           | Q8        |
|                                                       |                                                                                                                                                                                                                                                                                                                                                                                                                                                                                                                                                                                                                                                                                                                                                                                                |                                                                                                                                                                            | Hosp.   | Severe   | Mort.     | Hosp.     | Severe    | Mort.     |           | Hosp.     | Severe    | Mort.     | Hosp.    | Severe    | Mort.     |           |
| Aggarwal <sup>27</sup>                                | Def. yes                                                                                                                                                                                                                                                                                                                                                                                                                                                                                                                                                                                                                                                                                                                                                                                       | Prob. yes                                                                                                                                                                  | N/A     | Def. yes | Def. yes  | N/A       | Def. no   | Def. no   | Prob. yes | N/A       | Def. yes  | Def. yes  | N/A      | Prob. yes | Prob. no  | Prob. yes |
| Argenziano <sup>17</sup>                              | Def. yes                                                                                                                                                                                                                                                                                                                                                                                                                                                                                                                                                                                                                                                                                                                                                                                       | Prob. yes                                                                                                                                                                  | N/A     | Prob. no | N/A       | N/A       | Def. no   | N/A       | Prob. yes | N/A       | Prob. yes | N/A       | N/A      | Prob. yes | N/A       | Prob. no  |
| Atkins <sup>28</sup>                                  | Def. yes                                                                                                                                                                                                                                                                                                                                                                                                                                                                                                                                                                                                                                                                                                                                                                                       | Prob. yes                                                                                                                                                                  | N/A     | N/A      | Def. yes  | Def. yes  | N/A       | Def. yes  | Prob. yes | Def. yes  | N/A       | Prob. yes | N/A      | N/A       | Def. no   | Prob. no  |
| Attaway <sup>29</sup>                                 | Def. yes                                                                                                                                                                                                                                                                                                                                                                                                                                                                                                                                                                                                                                                                                                                                                                                       | Def. yes                                                                                                                                                                   | Def. no | Def. no  | Prob. yes | Def. yes  | Def. yes  | Def. yes  | Prob. yes | Prob. yes | Prob. yes | Prob. yes | Prob. no | Prob. no  | Def. no   | Prob. no  |
| Auld <sup>30</sup>                                    | Def. yes                                                                                                                                                                                                                                                                                                                                                                                                                                                                                                                                                                                                                                                                                                                                                                                       | Prob. no                                                                                                                                                                   | N/A     | N/A      | Def. yes  | N/A       | N/A       | Def. no   | Prob. no  | N/A       | N/A       | Def. yes  | N/A      | N/A       | Def. no   | Prob. no  |
| Azoulay <sup>31</sup>                                 | Def. yes                                                                                                                                                                                                                                                                                                                                                                                                                                                                                                                                                                                                                                                                                                                                                                                       | Prob. yes                                                                                                                                                                  | N/A     | N/A      | Def. yes  | N/A       | N/A       | Prob. yes | Prob. yes | N/A       | N/A       | Prob. yes | N/A      | N/A       | Prob. no  | Prob. yes |
| Barman <sup>32</sup>                                  | Def. yes                                                                                                                                                                                                                                                                                                                                                                                                                                                                                                                                                                                                                                                                                                                                                                                       | Prob. no                                                                                                                                                                   | N/A     | N/A      | Prob. yes | Def. no   | N/A       | N/A       | Prob. yes | N/A       | N/A       | Prob. yes | N/A      | N/A       | Def. no   | Prob. no  |
| Bello-Chavolla <sup>19</sup>                          | Def. yes                                                                                                                                                                                                                                                                                                                                                                                                                                                                                                                                                                                                                                                                                                                                                                                       | Prob. no                                                                                                                                                                   | Def. no | Def. no  | Prob. no  | Prob. no  | Prob. yes | Prob. yes | Prob. no  | Prob. no  | Prob. no  | Prob. no  | Def. no  | Def. no   | Def. no   | Def. no   |
| Bravi <sup>33</sup>                                   | Def. yes                                                                                                                                                                                                                                                                                                                                                                                                                                                                                                                                                                                                                                                                                                                                                                                       | Prob. yes                                                                                                                                                                  | N/A     | Def. no  | Def. yes  | Prob. yes | Prob. yes | Prob. yes | Prob. yes | Prob. yes | Prob. no  | Prob. no  | Def. no  | Def. no   | Def. no   | Def. no   |
| Buckner <sup>34</sup>                                 | Def. yes                                                                                                                                                                                                                                                                                                                                                                                                                                                                                                                                                                                                                                                                                                                                                                                       | Prob. no                                                                                                                                                                   | N/A     | Def. no  | Def. yes  | N/A       | Def. no   | Def. no   | Prob. yes | N/A       | Def. yes  | Def. yes  | N/A      | Prob. yes | Prob. yes | Def. no   |
| Calmes <sup>35</sup>                                  | Def. yes                                                                                                                                                                                                                                                                                                                                                                                                                                                                                                                                                                                                                                                                                                                                                                                       | Def. yes                                                                                                                                                                   | N/A     | Prob. no | Prob. yes | N/A       | Def. yes  | Def. yes  | Prob. yes | N/A       | Def. yes  | Prob. yes | N/A      | Def. no   | Def. no   | Prob. no  |
| Caraballo <sup>36</sup>                               | Def. yes                                                                                                                                                                                                                                                                                                                                                                                                                                                                                                                                                                                                                                                                                                                                                                                       | Prob. yes                                                                                                                                                                  | N/A     | N/A      | N/A       | N/A       | N/A       | Def. no   | Prob. no  | N/A       | N/A       | Prob. yes | N/A      | N/A       | Def. no   | Prob. yes |
| Cen et al <sup>37</sup>                               | Def. yes                                                                                                                                                                                                                                                                                                                                                                                                                                                                                                                                                                                                                                                                                                                                                                                       | Prob. no                                                                                                                                                                   | N/A     | Def. yes | Def. yes  | N/A       | Def. yes  | Def. no   | Prob. yes | N/A       | Def. yes  | Def. yes  | N/A      | Prob. yes | Prob. yes | Prob. yes |
| Ciardullo <sup>26</sup>                               | Def. yes                                                                                                                                                                                                                                                                                                                                                                                                                                                                                                                                                                                                                                                                                                                                                                                       | Prob. yes                                                                                                                                                                  | N/A     | N/A      | Prob. yes | N/A       | N/A       | Prob. yes | Prob. no  | N/A       | N/A       | Def. yes  | N/A      | N/A       | Def. yes  | Def. no   |
| Cui <sup>11</sup>                                     | Def. yes                                                                                                                                                                                                                                                                                                                                                                                                                                                                                                                                                                                                                                                                                                                                                                                       | Prob. no                                                                                                                                                                   | N/A     | N/A      | Def. yes  | N/A       | N/A       | Prob. yes | Prob. yes | N/A       | N/A       | Def. yes  | N/A      | N/A       | Def. yes  | Prob. no  |
| Feng Y <sup>4</sup>                                   | Def. yes                                                                                                                                                                                                                                                                                                                                                                                                                                                                                                                                                                                                                                                                                                                                                                                       | Prob. yes                                                                                                                                                                  | N/A     | Def. no  | Def. yes  | N/A       | Def. no   | Def. no   | Prob. yes | N/A       | Def. no   | N/A       | N/A      | Def. no   | N/A       | Def. no   |
| Giannouchos T <sup>20</sup>                           | Prob. yes                                                                                                                                                                                                                                                                                                                                                                                                                                                                                                                                                                                                                                                                                                                                                                                      | Prob. no                                                                                                                                                                   | Def. no | Def. no  | Prob. no  | Def. yes  | Def. yes  | N/A       | Prob. no  | Prob. no  | Prob. no  | Prob. no  | N/A      | N/A       | N/A       | Prob. no  |
| Goyal <sup>18</sup>                                   | Def. yes                                                                                                                                                                                                                                                                                                                                                                                                                                                                                                                                                                                                                                                                                                                                                                                       | Prob. yes                                                                                                                                                                  | N/A     | Def. no  | Def. yes  | N/A       | Def. no   | N/A       | Prob. yes | N/A       | Prob. yes | Prob. yes | N/A      | Def. no   | Def. no   | Prob. no  |
| Grasselli G <sup>25</sup>                             | Def. yes                                                                                                                                                                                                                                                                                                                                                                                                                                                                                                                                                                                                                                                                                                                                                                                       | Def. no                                                                                                                                                                    | N/A     | N/A      | Def. yes  | N/A       | N/A       | Prob. yes | Prob. no  | N/A       | N/A       | Def. yes  | N/A      | N/A       | Def. no   | Def. no   |
| Guan W J <sup>5</sup>                                 | Def. yes                                                                                                                                                                                                                                                                                                                                                                                                                                                                                                                                                                                                                                                                                                                                                                                       | Prob. no                                                                                                                                                                   | N/A     | Def. no  | Prob. yes | N/A       | Prob. no  | Prob. no  | Prob. no  | N/A       | Prob. yes | Prob. no  | N/A      | Def. no   | Def. no   | Def. no   |

|                                     |          |           |           |           |           |           |           |           |           |           |           |           |           |           |           |           |
|-------------------------------------|----------|-----------|-----------|-----------|-----------|-----------|-----------|-----------|-----------|-----------|-----------|-----------|-----------|-----------|-----------|-----------|
| Gupta R <sup>38</sup>               | Def. yes | Prob. yes | N/A       | N/A       | Prob. yes | N/A       | N/A       | Prob. yes | Prob. yes | N/A       | N/A       | Def. yes  | N/A       | N/A       | Def. yes  | Prob. yes |
| Gupta S <sup>16</sup>               | Def. yes | Prob. yes | N/A       | N/A       | Def. yes  | N/A       | N/A       | Def. yes  | Prob. yes | N/A       | N/A       | Prob. yes | N/A       | N/A       | Def. no   | Prob. no  |
| Hansen <sup>39</sup>                | Def. yes | Prob. no  | N/A       | Def. no   | Prob. yes | N/A       | Prob. no  | Prob. no  | Prob. no  | N/A       | Prob. yes | Prob. yes | N/A       | Prob. yes | Prob. yes | Def. no   |
| Huang C <sup>3</sup>                | Def. yes | Prob. yes | N/A       | Prob. yes | Def. yes  | N/A       | Def. no   | N/A       | Prob. yes | N/A       | Prob. yes | N/A       | N/A       | Def. no   | Def. no   | Prob. yes |
| Islam <sup>40</sup>                 | Def. yes | Prob. no  | N/A       | N/A       | Def. no   | N/A       | N/A       | Def. no   | Prob. no  | N/A       | N/A       | Def. yes  | N/A       | N/A       | Def. yes  | Def. no   |
| Israelsen <sup>41</sup>             | Def. yes | Prob. no  | N/A       | Def. no   | Def. yes  | N/A       | Def. no   | N/A       | Prob. no  | N/A       | Prob. yes | N/A       | N/A       | Def. no   | N/A       | Def. no   |
| Itelman <sup>42</sup>               | Def. yes | Def. no   | N/A       | Def. no   | Def. yes  | N/A       | Def. no   | N/A       | Def. no   | N/A       | Prob. yes | Def. yes  | N/A       | Def. no   | Prob. no  | Def. no   |
| Jalili <sup>43</sup>                | Def. yes | Prob. no  | N/A       | N/A       | Prob. yes | N/A       | N/A       | Def. no   | Prob. no  | N/A       | N/A       | Prob. yes | N/A       | N/A       | Prob. yes | Def. no   |
| Javanian <sup>44</sup>              | Def. yes | Prob. yes | N/A       | N/A       | Prob. yes | N/A       | N/A       | Def. yes  | Prob. yes | N/A       | N/A       | Def. yes  | N/A       | N/A       | Prob. yes | Prob. no  |
| Jiang <sup>2</sup>                  | Def. yes | Prob. yes | N/A       | N/A       | Prob. yes | N/A       | N/A       | Def. no   | Prob. yes | N/A       | N/A       | Def. yes  | N/A       | N/A       | Prob. yes | Prob. yes |
| Jimenez <sup>45</sup>               | Def. yes | Prob. no  | N/A       | Prob. no  | Prob. yes | N/A       | Def. no   | Prob. no  | Prob. no  | N/A       | Def. yes  | Def. yes  | N/A       | Def. yes  | Def. yes  | Prob. no  |
| Kalyanaraman Marcello <sup>46</sup> | Def. yes | Prob. no  | Prob. yes | N/A       | Prob. yes | Def. no   | N/A       | Def. no   | Prob. no  | Prob. yes | N/A       | Prob. yes | Prob. yes | N/A       | Def. no   | Def. no   |
| Kim <sup>47</sup>                   | Def. yes | Def. no   | N/A       | N/A       | Prob. yes | N/A       | Prob. no  | N/A       | Def. no   | N/A       | Prob. yes | N/A       | N/A       | Def. yes  | N/A       | Def. no   |
| Lagi <sup>48</sup>                  | Def. yes | Prob. no  | N/A       | Prob. no  | Def. yes  | N/A       | Def. no   | N/A       | Prob. no  | N/A       | Prob. yes | N/A       | N/A       | Prob. no  | N/A       | Def. no   |
| Lanini <sup>24</sup>                | Def. yes | Prob. no  | N/A       | N/A       | Prob. yes | N/A       | N/A       | Def. no   | Prob. no  | N/A       | N/A       | Def. yes  | N/A       | N/A       | Def. yes  | Def. no   |
| Li K <sup>10</sup>                  | Def. yes | Prob. no  | N/A       | N/A       | Def. yes  | N/A       | N/A       | Def. no   | Prob. no  | N/A       | N/A       | Prob. yes | N/A       | N/A       | Prob. no  | Prob. no  |
| Liu W <sup>49</sup>                 | Def. yes | Def. no   | N/A       | Def. no   | Def. yes  | N/A       | Def. no   | N/A       | Def. no   | N/A       | Prob. yes | Prob. yes | N/A       | Prob. yes | Prob. no  | Prob. no  |
| Ludwig <sup>50</sup>                | Def. yes | Prob. yes | N/A       | N/A       | Prob. yes | N/A       | N/A       | Def. no   | Prob. yes | N/A       | N/A       | Prob. yes | N/A       | N/A       | Def. no   | Def. no   |
| Mancilla-Galindo <sup>21</sup>      | Def. yes | Prob. yes | N/A       | N/A       | Prob. yes | N/A       | N/A       | Prob. yes | Prob. yes | N/A       | N/A       | Prob. yes | N/A       | N/A       | Def. no   | Def. no   |
| Mohamed <sup>14</sup>               | Def. yes | Prob. yes | N/A       | N/A       | Prob. yes | N/A       | N/A       | Def. yes  | Prob. yes | N/A       | N/A       | Prob. yes | N/A       | N/A       | Prob. no  | Def. no   |
| Parra-Bracamonte <sup>22</sup>      | Def. yes | Prob. yes | Prob. yes | N/A       | Prob. yes | Def. no   | N/A       | Def. yes  | Prob. yes | Prob. yes | N/A       | Prob. yes | Def. no   | N/A       | Def. no   | Def. no   |
| Rica R <sup>51</sup>                | Def. yes | Prob. no  | N/A       | Prob. yes | Def. yes  | N/A       | Def. no   | N/A       | Prob. yes | N/A       | Def. yes  | Prob. yes | N/A       | Def. no   | N/A       | Prob. no  |
| Salacup <sup>52</sup>               | Def. yes | Prob. yes | N/A       | N/A       | Prob. yes | N/A       | N/A       | Def. no   | Prob. yes | N/A       | N/A       | Prob. yes | N/A       | N/A       | Def. yes  | Prob. no  |
| Shah <sup>53</sup>                  | Def. yes | Prob. no  | N/A       | N/A       | Prob. yes | N/A       | N/A       | Def. yes  | Prob. no  | N/A       | N/A       | Prob. yes | N/A       | N/A       | Def. yes  | Def. no   |
| Smith A <sup>54</sup>               | Def. yes | Prob. yes | N/A       | N/A       | Prob. yes | N/A       | N/A       | Def. no   | Prob. yes | N/A       | N/A       | Prob. yes | N/A       | N/A       | Def. yes  | Def. no   |
| Song J <sup>55</sup>                | Def. yes | Prob. yes | N/A       | Def. no   | Prob. yes | N/A       | Def. no   | Def. no   | Prob. yes | N/A       | Def. no   | Prob. yes | N/A       | Def. yes  | Def. yes  | Def. no   |
| Suleyman G <sup>56</sup>            | Def. yes | Prob. yes | Prob. yes | Def. no   | Def. yes  | N/A       | Prob. no  | Prob. no  | Prob. yes | Prob. yes | Prob. yes | Def. yes  | Prob. yes | Def. yes  | Prob. yes | Def. no   |
| Tomlins J <sup>57</sup>             | Def. yes | Def. no   | N/A       | N/A       | Def. yes  | N/A       | N/A       | Def. no   | Def. no   | N/A       | N/A       | Prob. yes | N/A       | N/A       | Prob. no  | Def. no   |
| van Gerwen <sup>15</sup>            | Def. yes | Prob. no  | Prob. no  | Prob. no  | Prob. yes | Prob. yes | Prob. yes | Prob. yes | Prob. no  | Prob. yes | Def. yes  | Prob. yes | Prob. no  | Prob. no  | Prob. no  | Def. no   |
| Violi F <sup>23</sup>               | Def. yes | Prob. no  | N/A       | N/A       | Def. yes  | N/A       | N/A       | Def. yes  | Prob. no  | N/A       | N/A       | Prob. yes | N/A       | N/A       | Def. no   | Def. no   |
| Wang D <sup>12</sup>                | Def. yes | Prob. yes | N/A       | Def. no   | Def. yes  | N/A       | Def. no   | N/A       | Prob. yes | N/A       | Prob. yes | N/A       | N/A       | Prob. no  | N/A       | Prob. no  |
| Wang L <sup>1</sup>                 | Def. yes | Def. no   | N/A       | N/A       | Prob. yes | N/A       | N/A       | Def. no   | Def. no   | N/A       | N/A       | Prob. yes | N/A       | N/A       | Def. no   | Def. no   |
| Wang Y <sup>9</sup>                 | Def. yes | Prob. no  | N/A       | Def. no   | Def. yes  | N/A       | Prob. no  | N/A       | Prob. no  | N/A       | Prob. no  | N/A       | N/A       | Def. no   | N/A       | Def. no   |
| Wu F <sup>58</sup>                  | Prob. no | Prob. yes | N/A       | Def. no   | Prob. yes | N/A       | Def. yes  | Def. yes  | Def. no   | N/A       | Prob. no  | Prob. yes | N/A       | Def. no   | Def. no   | Def. no   |
| Yang X <sup>6</sup>                 | Def. yes | Prob. yes | N/A       | N/A       | Def. yes  | N/A       | N/A       | N/A       | Prob. yes | N/A       | N/A       | Def. yes  | N/A       | N/A       | Prob. yes | Prob. no  |
| Zhang G <sup>13</sup>               | Def. yes | Prob. yes | N/A       | Def. no   | Prob. yes | N/A       | Def. no   | N/A       | Prob. yes | N/A       | Prob. yes | N/A       | N/A       | Prob. no  | N/A       | Prob. no  |

|                       |          |           |     |         |           |     |         |         |           |     |           |          |     |     |          |          |
|-----------------------|----------|-----------|-----|---------|-----------|-----|---------|---------|-----------|-----|-----------|----------|-----|-----|----------|----------|
| Zhang J <sup>8</sup>  | Def. yes | Prob. yes | N/A | Def. no | N/A       | N/A | Def. no | N/A     | Prob. yes | N/A | Prob. yes | N/A      | N/A | N/A | N/A      | Def. no  |
| Zheng F <sup>59</sup> | Def. yes | Def. no   | N/A | Def. no | Prob. yes | N/A | Def. no | N/A     | Def. no   | N/A | Prob. yes | N/A      | N/A | N/A | N/A      | Def. no  |
| Zhou F <sup>7</sup>   | Def. yes | Prob. yes | N/A | N/A     | Prob. yes | N/A | N/A     | Def. no | Prob. yes | N/A | N/A       | Def. yes | N/A | N/A | Def. yes | Prob. no |



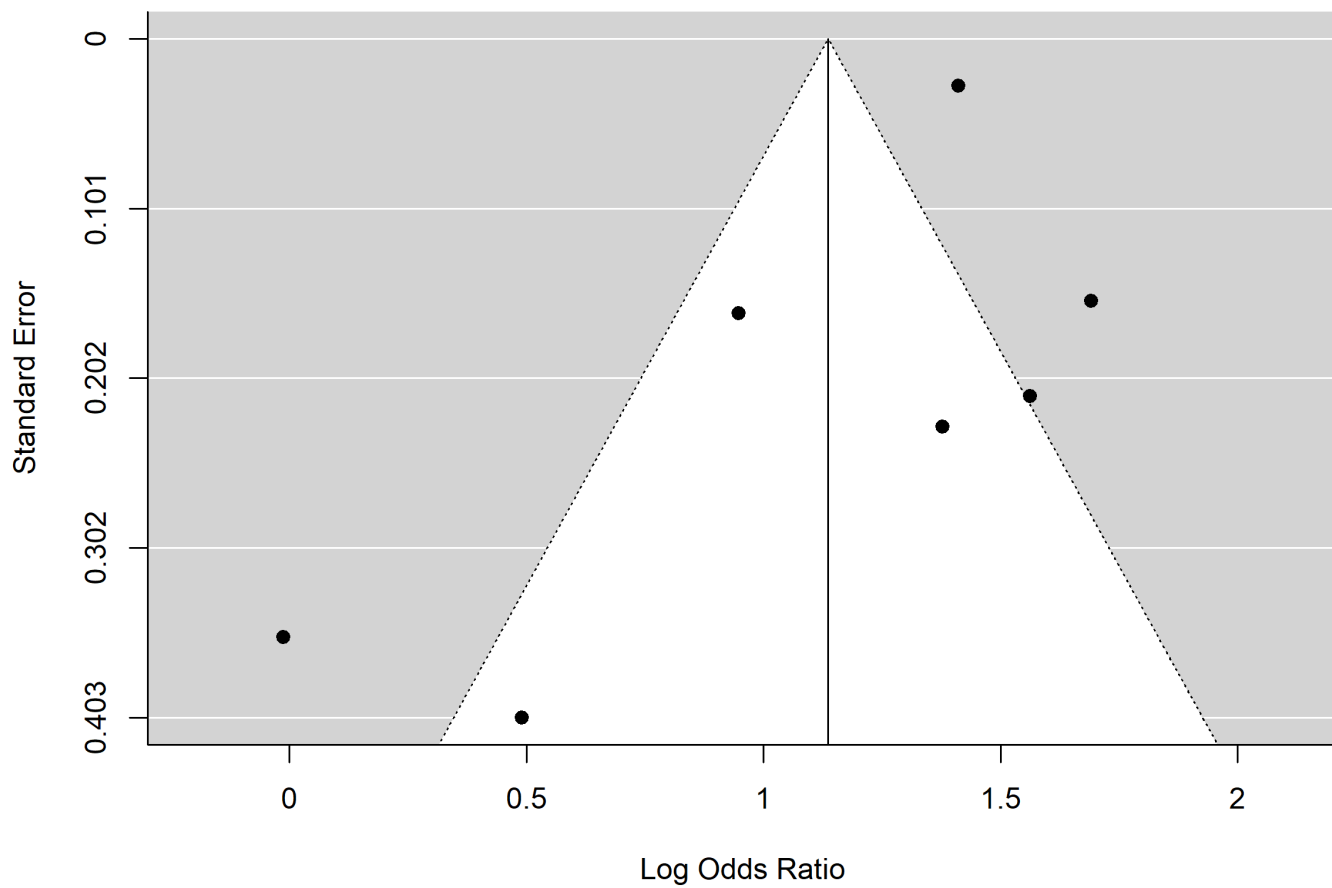

**Figure S2: Funnel plot for hospitalization meta-analysis**

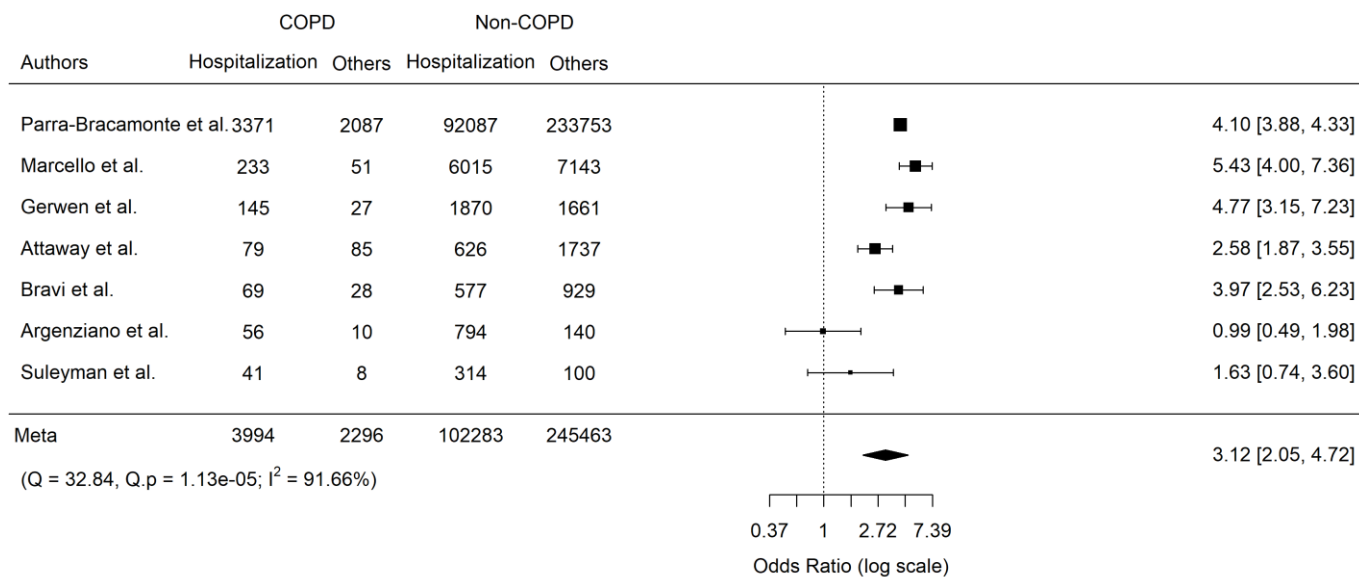

**Figure S3: Forest plot for hospitalization meta-analysis of all studies where data was available, showing significant heterogeneity (Cochran’s Q and I<sup>2</sup> tests) among the estimates. Odds ratios [95% confidence intervals] for individual studies (squares and bars) and the pooled odds ratio [95% CI] (diamond).**

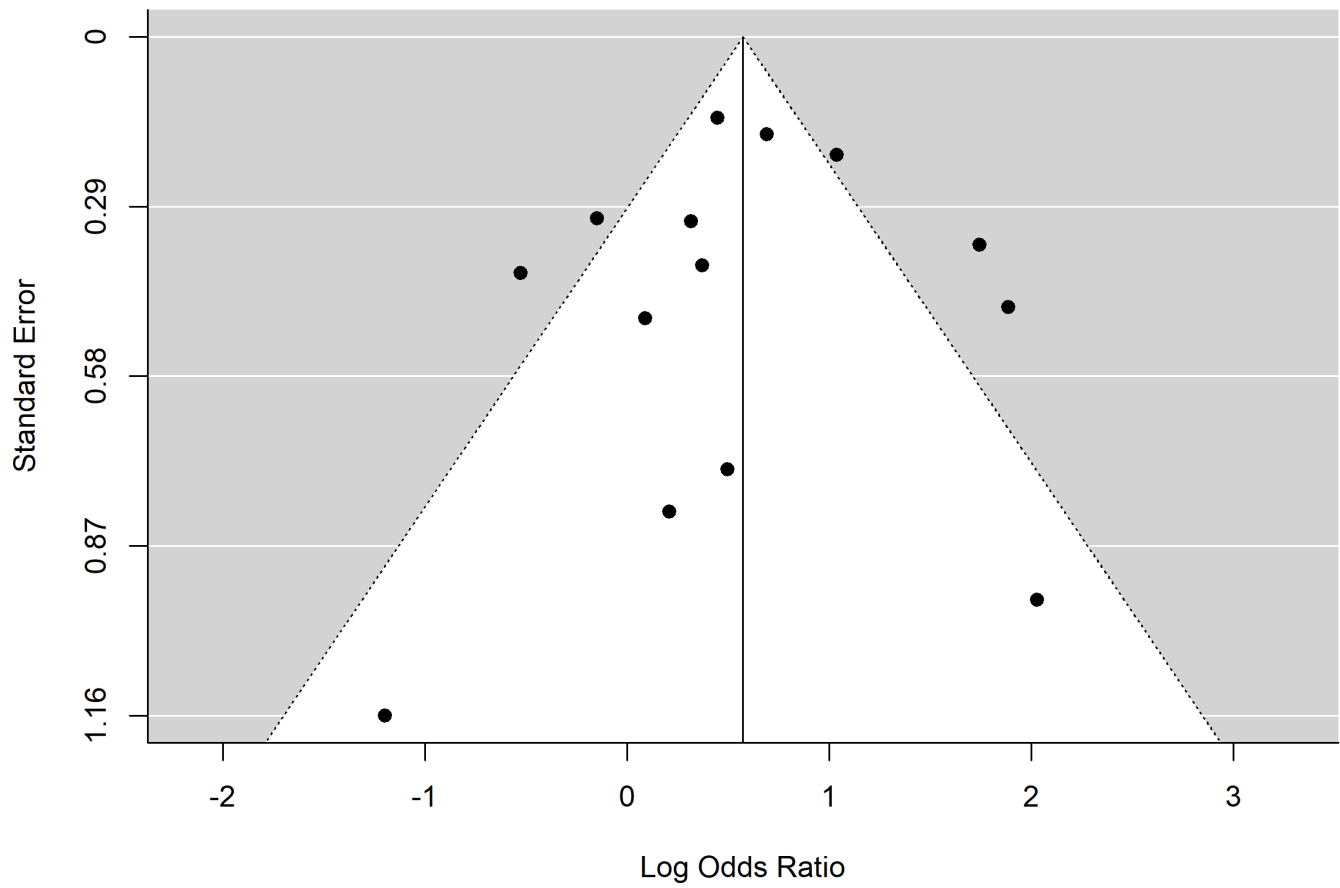

**Figure S4: Funnel plot for severe COVID-19 meta-analysis**

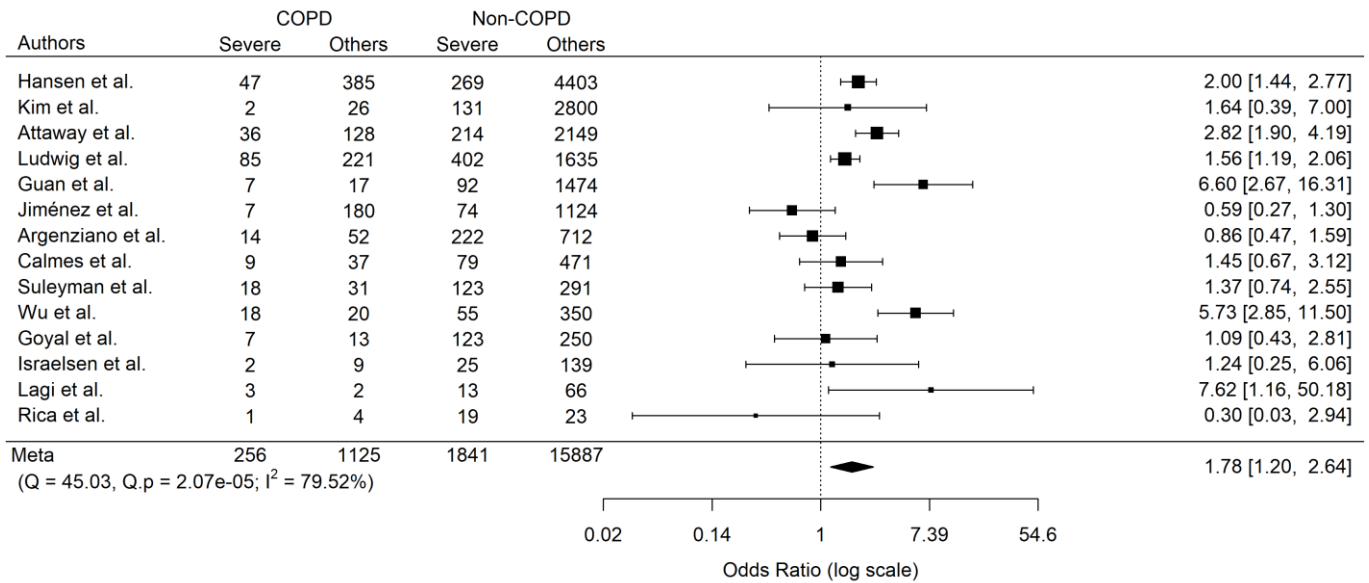

**Figure S5: Forest plot for severe COVID-19 meta-analysis of all studies where data was available, showing significant heterogeneity (Cochran’s Q and I<sup>2</sup> tests) among the estimates. Odds ratios [95% confidence intervals] for individual studies (squares and bars) and the pooled odds ratio [95% CI] (diamond).**

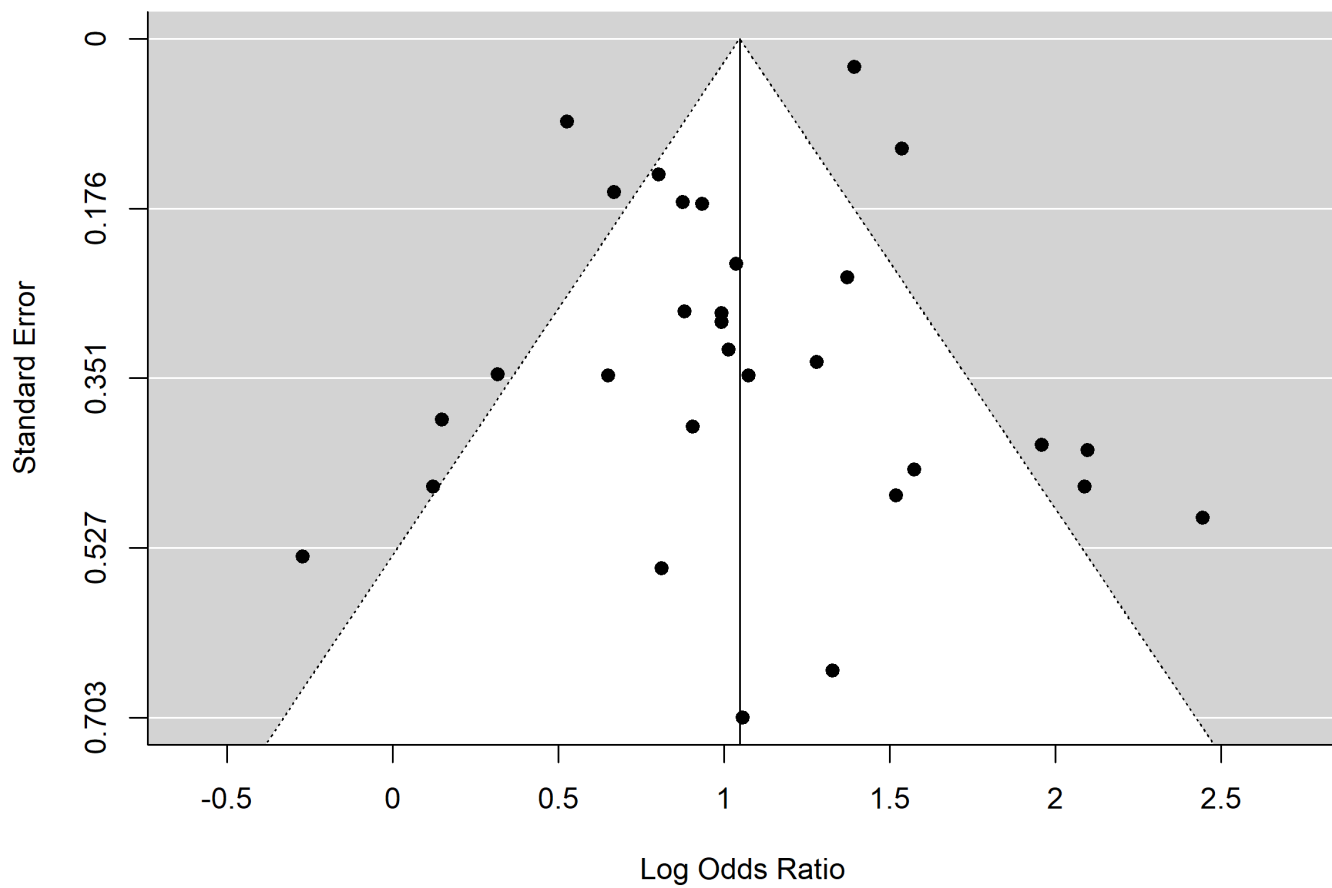

**Figure S6: Funnel plot for mortality meta-analysis**

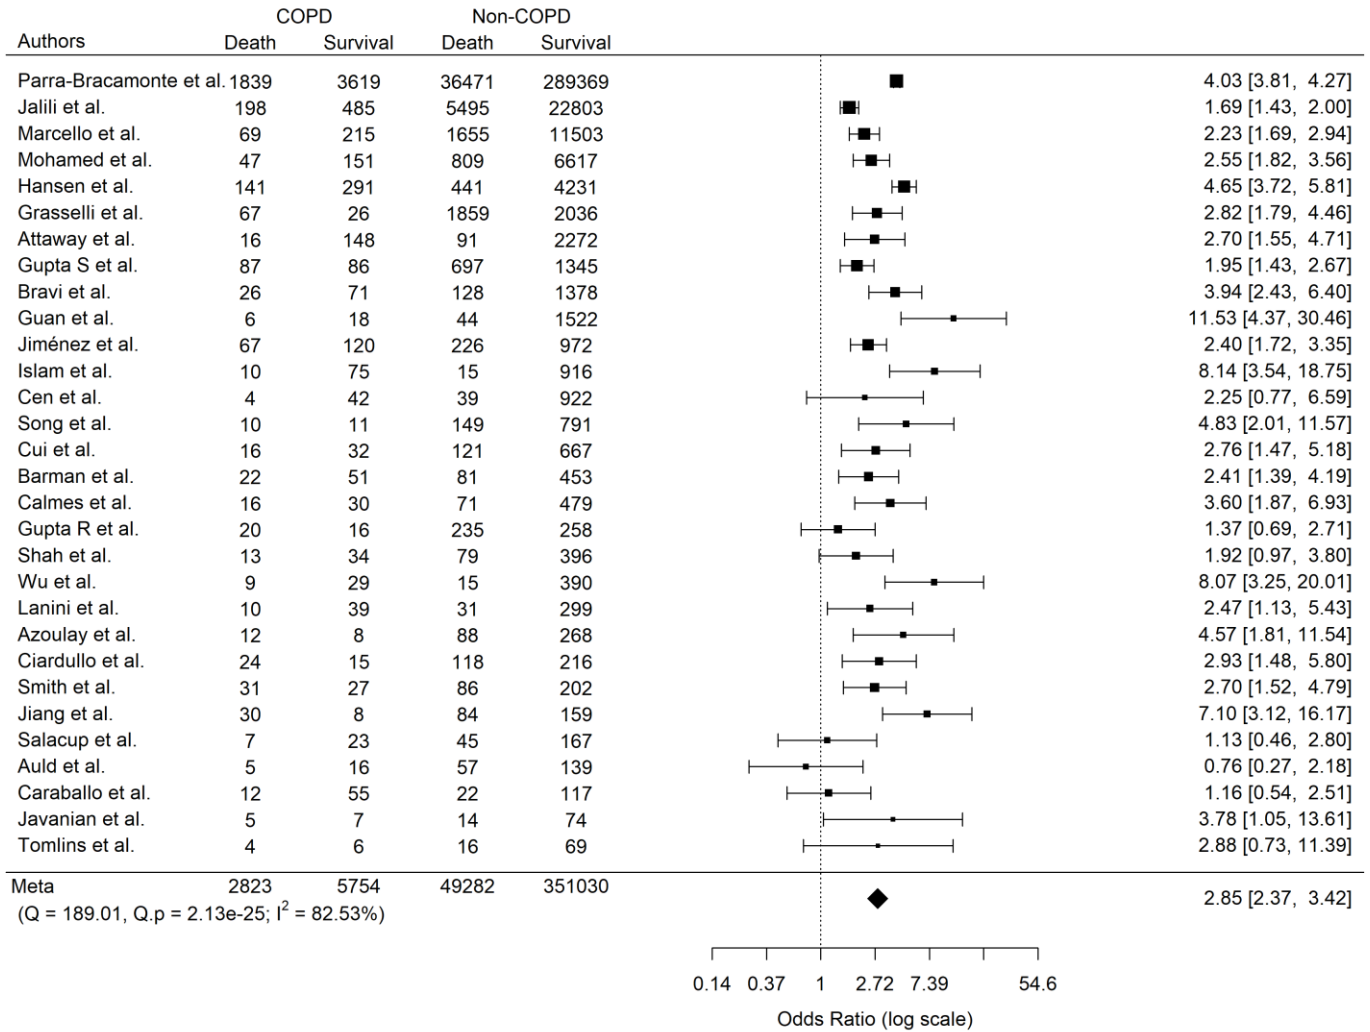

**Figure S7: Forest plot for mortality meta-analysis of all studies where data was available, showing significant heterogeneity (Cochran's Q and I<sup>2</sup> tests) among the estimates. Odds ratios [95% confidence intervals] for individual studies (squares and bars) and the pooled odds ratio [95% CI] (diamond).**

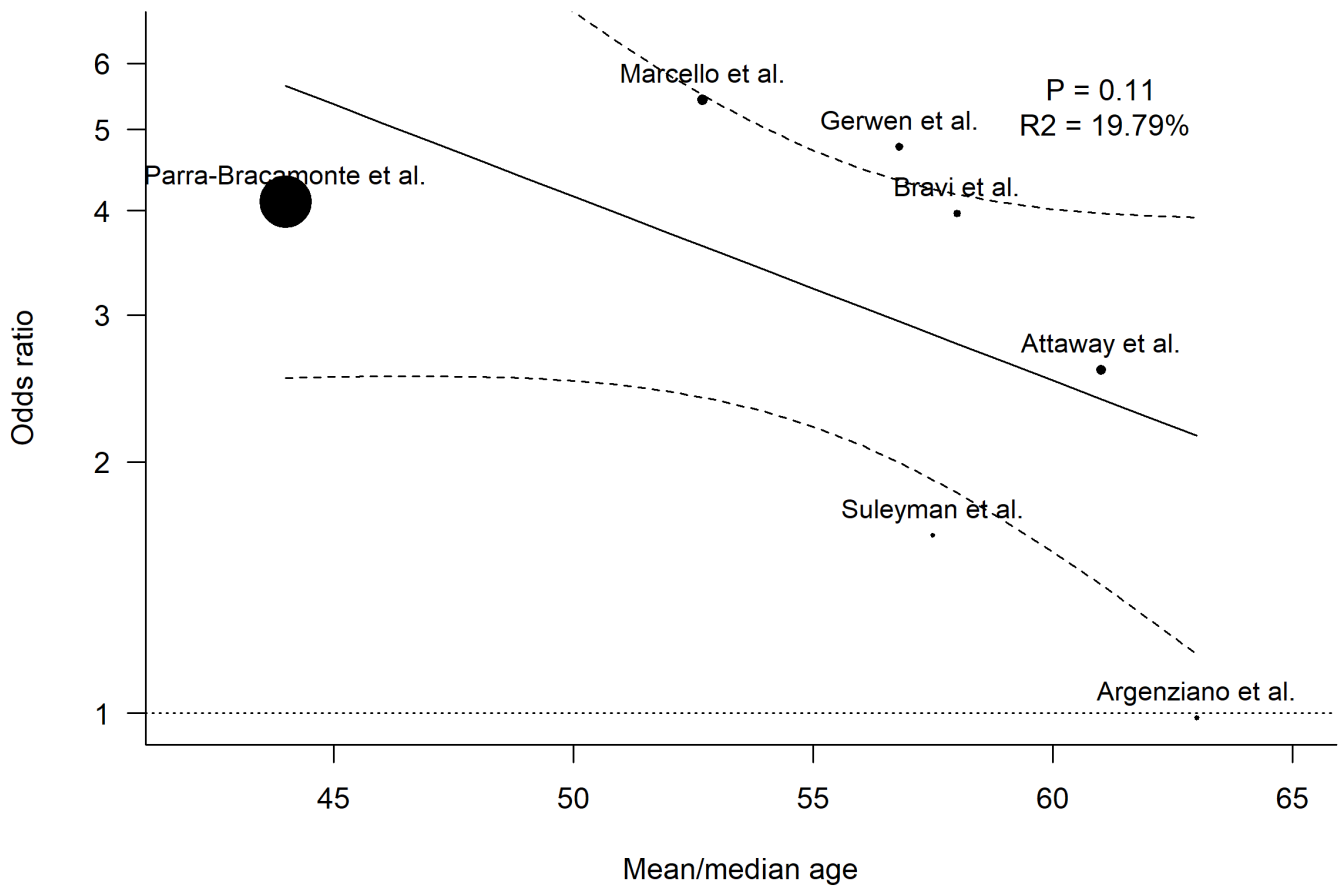

**Figure S8: Meta-regression of odds ratios for hospitalization against age (mean or median as available).**

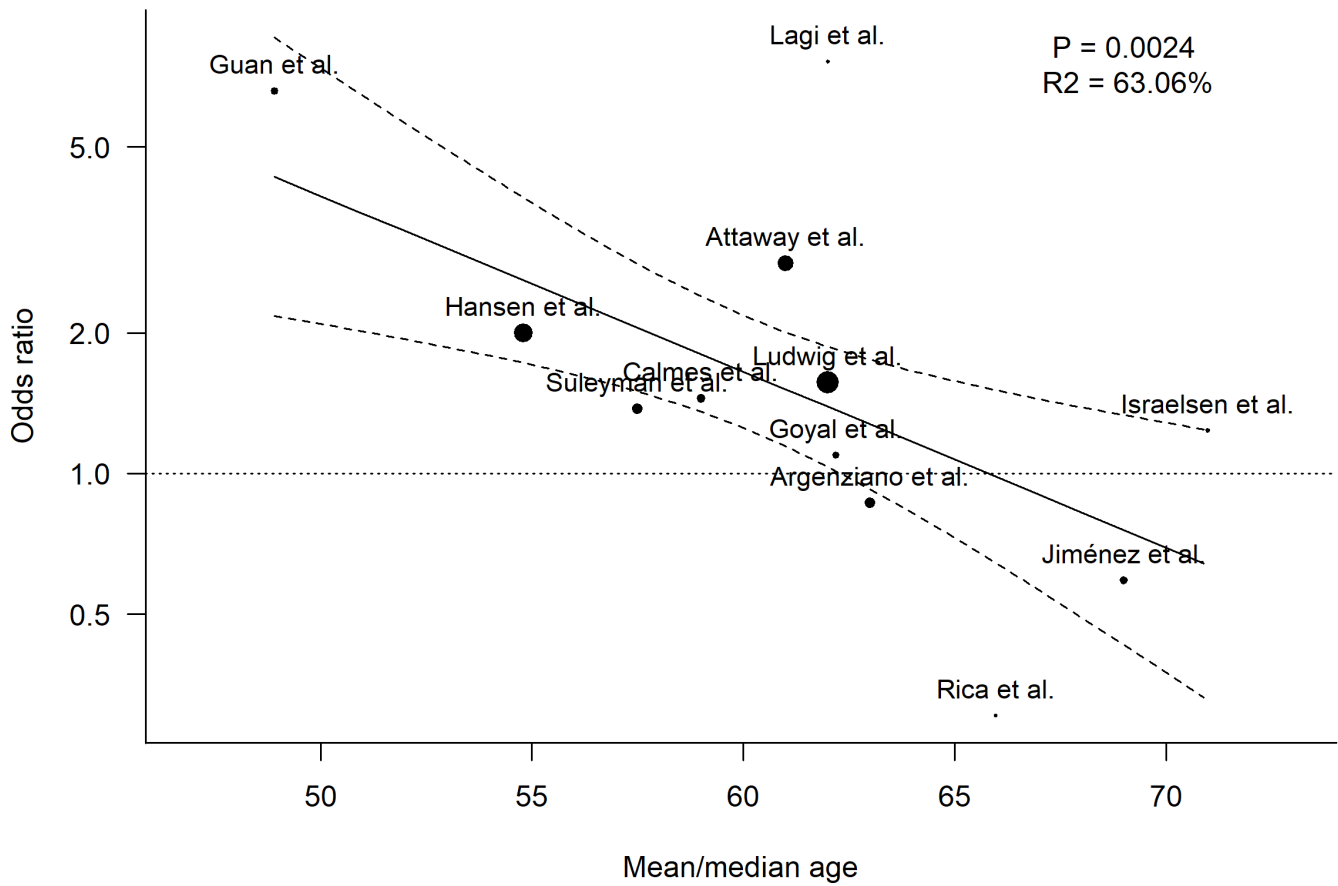

**Figure S9: Meta-regression of odds ratios for severe COVID-19 (ICU admission) against age (mean or median as available).**



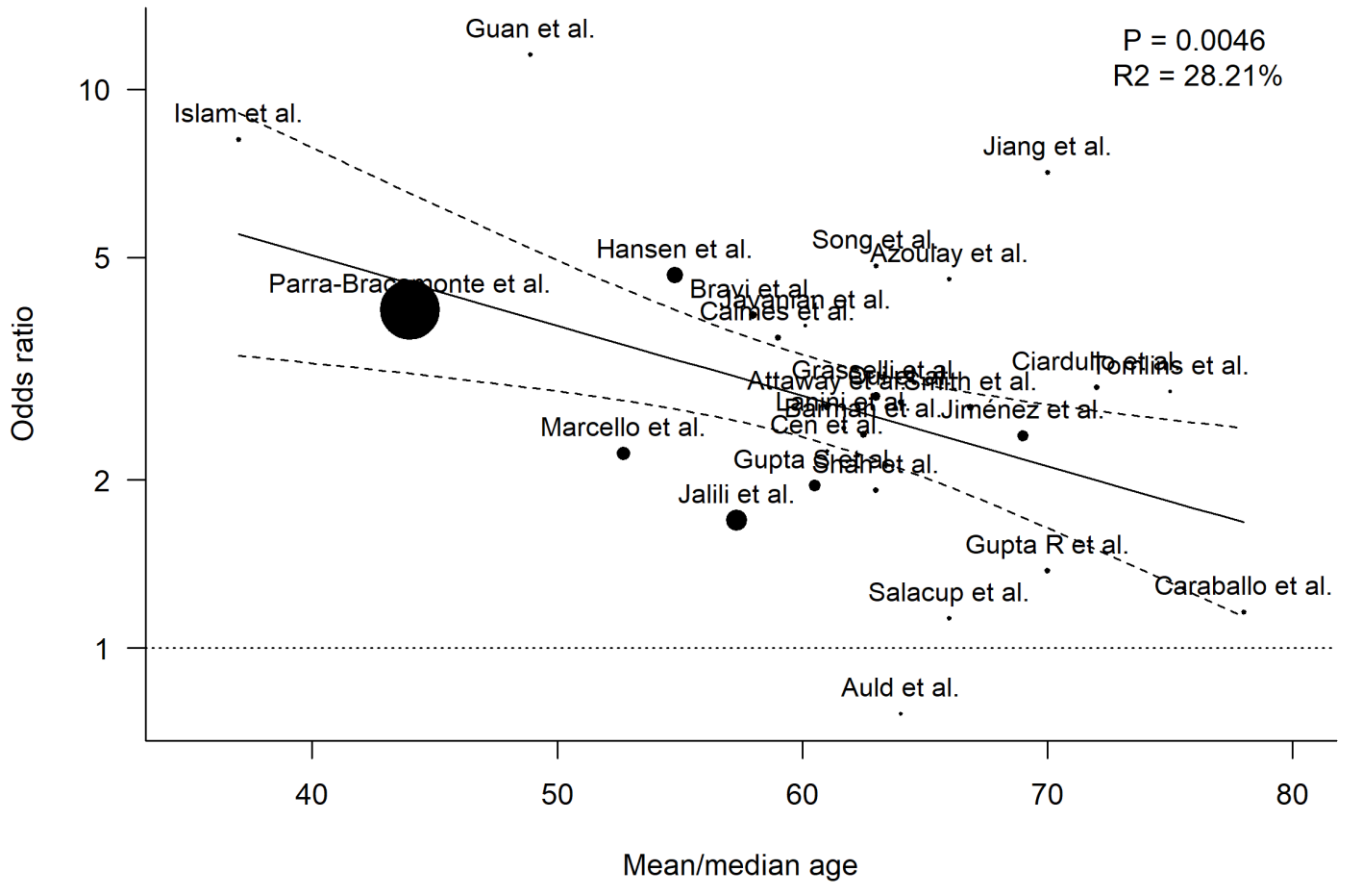

Figure S10: Meta-regression of odds ratios for mortality against age (mean or median as available).

## REFERENCES FOR ONLINE SUPPLEMENT

1. Wang L, He WB, Yu XM, Hu DL, Jiang H. Prolonged prothrombin time at admission predicts poor clinical outcome in COVID-19 patients. *World journal of clinical cases* 2020; **8**(19): 4370-9. doi:10.12998/wjcc.v8.i19.4370.
2. Jiang Y, Abudurexiti S, An MM, Cao D, Wei J, Gong P. Risk factors associated with 28-day all-cause mortality in older severe COVID-19 patients in Wuhan, China: a retrospective observational study. *Sci Rep* 2020; **10**(1): 22369. doi:10.1038/s41598-020-79508-3.
3. Huang C, Wang Y, Li X, et al. Clinical features of patients infected with 2019 novel coronavirus in Wuhan, China. *Lancet* 2020; **395**(10223): 497-506. doi:10.1016/S0140-6736(20)30183-5.
4. Feng Y, Ling Y, Bai T, et al. COVID-19 with Different Severities: A Multicenter Study of Clinical Features. *Am J Respir Crit Care Med* 2020; **201**(11): 1380-8. doi:10.1164/rccm.202002-0445OC.
5. Guan WJ, Liang WH, Zhao Y, et al. Comorbidity and its impact on 1590 patients with COVID-19 in China: a nationwide analysis. *Eur Respir J* 2020; **55**(5): 2000547. doi:10.1183/13993003.00547-2020.
6. Yang X, Yu Y, Xu J, et al. Clinical course and outcomes of critically ill patients with SARS-CoV-2 pneumonia in Wuhan, China: a single-centered, retrospective, observational study. *Lancet Respir Med* 2020; **8**(5): 475-81. doi:10.1016/S2213-2600(20)30079-5.
7. Zhou F, Yu T, Du R, et al. Clinical course and risk factors for mortality of adult inpatients with COVID-19 in Wuhan, China: a retrospective cohort study. *Lancet* 2020; **395**(10229): 1054-62. doi:10.1016/S0140-6736(20)30566-3.
8. Zhang JJ, Dong X, Cao YY, et al. Clinical characteristics of 140 patients infected with SARS-CoV-2 in Wuhan, China. *Allergy* 2020; **75**(7): 1730-41. doi:10.1111/all.14238.
9. Wang Y, Zhou Y, Yang Z, Xia D, Hu Y, Geng S. Clinical Characteristics of Patients with Severe Pneumonia Caused by the SARS-CoV-2 in Wuhan, China. *Respiration* 2020; **99**(8): 649-57. doi:10.1159/000507940.
10. Li K, Chen D, Chen S, et al. Predictors of fatality including radiographic findings in adults with COVID-19. *Respir Res* 2020; **21**(1): 146. doi:10.1186/s12931-020-01411-2.
11. Cui N, Yan R, Qin C, Zhao J. Clinical Characteristics and Immune Responses of 137 Deceased Patients With COVID-19: A Retrospective Study. *Front Cell Infect Microbiol* 2020; **10**(774): 595333. doi:10.3389/fcimb.2020.595333.
12. Wang D, Hu B, Hu C, et al. Clinical Characteristics of 138 Hospitalized Patients With 2019 Novel Coronavirus-Infected Pneumonia in Wuhan, China. *JAMA* 2020; **323**(11): 1061-9. doi:10.1001/jama.2020.1585.
13. Zhang G, Hu C, Luo L, et al. Clinical features and short-term outcomes of 221 patients with COVID-19 in Wuhan, China. *J Clin Virol* 2020; **127**: 104364. doi:10.1016/j.jcv.2020.104364.
14. Mohamed NE, Benn EKT, Astha V, et al. Association between chronic kidney disease and COVID-19-related mortality in New York. *World J Urol* [Published online 23 January 2021]. doi:10.1007/s00345-020-03567-4.
15. van Gerwen M, Alsen M, Little C, et al. Risk factors and outcomes of COVID-19 in New York City; a retrospective cohort study. *J Med Virol* 2021; **93**(2): 907-15. doi:10.1002/jmv.26337.
16. Gupta S, Hayek SS, Wang W, et al. Factors Associated With Death in Critically Ill Patients With Coronavirus Disease 2019 in the US. *JAMA Intern Med* 2020; **180**(11): 1436-46. doi:10.1001/jamainternmed.2020.3596.

17. Argenziano MG, Bruce SL, Slater CL, et al. Characterization and clinical course of 1000 patients with coronavirus disease 2019 in New York: retrospective case series. *BMJ* 2020; **369**: m1996. doi:10.1136/bmj.m1996.
18. Goyal P, Choi JJ, Pinheiro LC, et al. Clinical Characteristics of Covid-19 in New York City. *N Engl J Med* 2020; **382**(24): 2372-4. doi:10.1056/NEJMc2010419.
19. Bello-Chavolla OY, Gonzalez-Diaz A, Antonio-Villa NE, et al. Unequal impact of structural health determinants and comorbidity on COVID-19 severity and lethality in older Mexican adults: Considerations beyond chronological aging. *J Gerontol A Biol Sci Med Sci* [Published online 29 June 2020]. doi:10.1093/gerona/glaa163.
20. Giannouchos TV, Sussman RA, Mier JM, Poulas K, Farsalinos K. Characteristics and risk factors for COVID-19 diagnosis and adverse outcomes in Mexico: an analysis of 89,756 laboratory-confirmed COVID-19 cases. *Eur Respir J* [Published online 1 August 2020]. doi:10.1183/13993003.02144-2020.
21. Mancilla-Galindo J, Vera-Zertuche JM, Navarro-Cruz AR, et al. Development and validation of the patient history COVID-19 (PH-Covid19) scoring system: a multivariable prediction model of death in Mexican patients with COVID-19. *Epidemiol Infect* 2020; **148**: e286. doi:10.1017/S0950268820002903.
22. Parra-Bracamonte GM, Lopez-Villalobos N, Parra-Bracamonte FE. Clinical characteristics and risk factors for mortality of patients with COVID-19 in a large data set from Mexico. *Ann Epidemiol* 2020; **52**: 93-8 e2. doi:10.1016/j.annepidem.2020.08.005.
23. Violi F, Cangemi R, Romiti GF, et al. Is Albumin Predictor of Mortality in COVID-19? *Antioxid Redox Signal* [Published online 12 June 2020]. doi:10.1089/ars.2020.8142.
24. Lanini S, Montaldo C, Nicastri E, et al. COVID-19 disease-Temporal analyses of complete blood count parameters over course of illness, and relationship to patient demographics and management outcomes in survivors and non-survivors: A longitudinal descriptive cohort study. *PLoS One* 2020; **15**(12): e0244129. doi:10.1371/journal.pone.0244129.
25. Grasselli G, Greco M, Zanella A, et al. Risk Factors Associated With Mortality Among Patients With COVID-19 in Intensive Care Units in Lombardy, Italy. *JAMA Intern Med* 2020; **180**(10): 1345-55. doi:10.1001/jamainternmed.2020.3539.
26. Ciardullo S, Zerbini F, Perra S, et al. Impact of diabetes on COVID-19-related in-hospital mortality: a retrospective study from Northern Italy. *J Endocrinol Invest* 2020. doi:10.1007/s40618-020-01382-7.
27. Aggarwal A, Shrivastava A, Kumar A, Ali A. Clinical and Epidemiological Features of SARS-CoV-2 Patients in SARI Ward of a Tertiary Care Centre in New Delhi. *The Journal of the Association of Physicians of India* 2020; **68**(7): 19-26.
28. Atkins JL, Masoli JAH, Delgado J, et al. Preexisting Comorbidities Predicting COVID-19 and Mortality in the UK Biobank Community Cohort. *J Gerontol A Biol Sci Med Sci* 2020; **75**(11): 2224-30. doi:10.1093/gerona/glaa183.
29. Attaway AA, Zein J, Hatipoglu US. SARS-CoV-2 infection in the COPD population is associated with increased healthcare utilization: An analysis of Cleveland clinic's COVID-19 registry. *EClinicalMedicine* 2020; **26**: 100515. doi:10.1016/j.eclinm.2020.100515.
30. Auld SC, Caridi-Scheible M, Blum JM, et al. ICU and Ventilator Mortality Among Critically Ill Adults With Coronavirus Disease 2019. *Crit Care Med* 2020; **48**(9): e799-e804. doi:10.1097/CCM.0000000000004457.
31. Azoulay E, Fartoukh M, Darmon M, et al. Increased mortality in patients with severe SARS-CoV-2 infection admitted within seven days of disease onset. *Intensive Care Med* 2020; **46**(9): 1714-22. doi:10.1007/s00134-020-06202-3.

32. Barman HA, Atici A, Sahin I, et al. Prognostic significance of cardiac injury in COVID-19 patients with and without coronary artery disease. *Coron Artery Dis* [Published online 23 June 2020]. doi:10.1097/MCA.0000000000000914.
33. Bravi F, Flacco ME, Carradori T, et al. Predictors of severe or lethal COVID-19, including Angiotensin Converting Enzyme inhibitors and Angiotensin II Receptor Blockers, in a sample of infected Italian citizens. *PLoS One* 2020; **15**(6): e0235248. doi:10.1371/journal.pone.0235248.
34. Buckner FS, McCulloch DJ, Atluri V, et al. Clinical Features and Outcomes of 105 Hospitalized Patients With COVID-19 in Seattle, Washington. *Clin Infect Dis* 2020; **71**(16): 2167-73. doi:10.1093/cid/ciaa632.
35. Calmes D, Graff S, Maes N, et al. Asthma and COPD Are Not Risk Factors for ICU Stay and Death in Case of SARS-CoV2 Infection. *J Allergy Clin Immunol Pract* 2021; **9**(1): 160-9. doi:10.1016/j.jaip.2020.09.044.
36. Caraballo C, McCullough M, Fuery MA, et al. COVID-19 infections and outcomes in a live registry of heart failure patients across an integrated health care system. *PLoS One* 2020; **15**(9): e0238829. doi:10.1371/journal.pone.0238829.
37. Cen Y, Chen X, Shen Y, et al. Risk factors for disease progression in patients with mild to moderate coronavirus disease 2019-a multi-centre observational study. *Clin Microbiol Infect* 2020; **26**(9): 1242-7. doi:10.1016/j.cmi.2020.05.041.
38. Gupta R, Agrawal R, Bukhari Z, et al. Higher comorbidities and early death in hospitalized African-American patients with Covid-19. *BMC Infect Dis* 2021; **21**(1): 78. doi:10.1186/s12879-021-05782-9.
39. Hansen ESH, Moeller AL, Backer V, et al. Severe outcomes of COVID-19 among patients with COPD and asthma. *ERJ Open Res* 2021; **7**(1): 00594-2020. doi:10.1183/23120541.00594-2020.
40. Islam MZ, Riaz BK, Islam A, et al. Risk factors associated with morbidity and mortality outcomes of COVID-19 patients on the 28th day of the disease course: a retrospective cohort study in Bangladesh. *Epidemiol Infect* 2020; **148**: e263. doi:10.1017/S0950268820002630.
41. Israelsen SB, Kristiansen KT, Hindsberger B, et al. Characteristics of patients with COVID-19 pneumonia at Hvidovre Hospital, March-April 2020. *Danish Medical Journal* 2020; **67**(6).
42. Itelman E, Wasserstrum Y, Segev A, et al. Clinical Characterization of 162 COVID-19 patients in Israel: Preliminary Report from a Large Tertiary Center. *The Israel Medical Association journal : IMAJ* 2020; **22**(5): 271-4.
43. Jalili M, Payandemehr P, Saghaei A, Sari HN, Safikhani H, Kolivand P. Characteristics and Mortality of Hospitalized Patients With COVID-19 in Iran: A National Retrospective Cohort Study. *Ann Intern Med* 2021; **174**(1): 125-7. doi:10.7326/M20-2911.
44. Javanian M, Bayani M, Shokri M, et al. Clinical and laboratory findings from patients with COVID-19 pneumonia in Babol North of Iran: a retrospective cohort study. *Romanian journal of internal medicine = Revue roumaine de medecine interne* 2020; **58**(3): 161-7. doi:10.2478/rjim-2020-0013.
45. Jimenez E, Fontan-Vela M, Valencia J, et al. Characteristics, complications and outcomes among 1549 patients hospitalised with COVID-19 in a secondary hospital in Madrid, Spain: a retrospective case series study. *BMJ Open* 2020; **10**(11): e042398. doi:10.1136/bmjopen-2020-042398.
46. Kalyanaraman Marcello R, Dolle J, Grami S, et al. Characteristics and outcomes of COVID-19 patients in New York City's public hospital system. *PLoS One* 2020; **15**(12): e0243027. doi:10.1371/journal.pone.0243027.
47. Kim S-R, Nam S-H, Kim Y-R. Risk Factors on the Progression to Clinical Outcomes of COVID-19 Patients in South Korea: Using National Data. *Int J Environ Res Pub Health* 2020; **17**(23): 8847.

48. Lagi F, Piccica M, Graziani L, et al. Early experience of an infectious and tropical diseases unit during the coronavirus disease (COVID-19) pandemic, Florence, Italy, February to March 2020. *Euro Surveill* 2020; **25**(17): 2000556. doi:10.2807/1560-7917.ES.2020.25.17.2000556.
49. Liu W, Tao ZW, Wang L, et al. Analysis of factors associated with disease outcomes in hospitalized patients with 2019 novel coronavirus disease. *Chin Med J (Engl)* 2020; **133**(9): 1032-8. doi:10.1097/CM9.0000000000000775.
50. Ludwig M, Jacob J, Basedow F, Andersohn F, Walker J. Clinical outcomes and characteristics of patients hospitalized for Influenza or COVID-19 in Germany. *Int J Infect Dis* 2021; **103**: 316-22. doi:10.1016/j.ijid.2020.11.204.
51. de la Rica R, Borges M, Aranda M, et al. Low Albumin Levels Are Associated with Poorer Outcomes in a Case Series of COVID-19 Patients in Spain: A Retrospective Cohort Study. *Microorganisms* 2020; **8**(8): 1106. doi:10.3390/microorganisms8081106.
52. Salacup G, Lo KB, Gul F, et al. Characteristics and clinical outcomes of COVID-19 patients in an underserved-inner city population: A single tertiary center cohort. *J Med Virol* [Published online 4 July 2020]. doi:10.1002/jmv.26252.
53. Shah P, Owens J, Franklin J, et al. Demographics, comorbidities and outcomes in hospitalized Covid-19 patients in rural southwest Georgia. *Ann Med* 2020; **52**(7): 354-60. doi:10.1080/07853890.2020.1791356.
54. Smith AA, Fridling J, Ibrahim D, Porter PS, Jr. Identifying Patients at Greatest Risk of Mortality due to COVID-19: A New England Perspective. *West J Emerg Med* 2020; **21**(4): 785-9. doi:10.5811/westjem.2020.6.47957.
55. Song J, Zeng M, Wang H, et al. Distinct effects of asthma and COPD comorbidity on disease expression and outcome in patients with COVID-19. *Allergy* [Published online 28 July 2020]. doi:10.1111/all.14517.
56. Suleyman G, Fadel RA, Malette KM, et al. Clinical Characteristics and Morbidity Associated With Coronavirus Disease 2019 in a Series of Patients in Metropolitan Detroit. *JAMA Netw Open* 2020; **3**(6): e2012270. doi:10.1001/jamanetworkopen.2020.12270.
57. Tomlins J, Hamilton F, Gunning S, Sheehy C, Moran E, MacGowan A. Clinical features of 95 sequential hospitalised patients with novel coronavirus 2019 disease (COVID-19), the first UK cohort. *J Infect* 2020; **81**(2): e59-e61. doi:10.1016/j.jinf.2020.04.020.
58. Wu F, Zhou Y, Wang Z, et al. Clinical characteristics of COVID-19 infection in chronic obstructive pulmonary disease: a multicenter, retrospective, observational study. *J Thorac Dis* 2020; **12**(5): 1811-23. doi:10.21037/jtd-20-1914.
59. Zheng F, Tang W, Li H, Huang YX, Xie YL, Zhou ZG. Clinical characteristics of 161 cases of corona virus disease 2019 (COVID-19) in Changsha. *European review for medical and pharmacological sciences* 2020; **24**(6): 3404-10. doi:10.26355/eurev\_202003\_20711.
